# Supplementary material for: Assessment of Value of Neighborhood Socioeconomic Status in Models That Use Electronic Health Record Data to Predict Health Care Use Rates and Mortality
Source: PubMed Central journal article supplement (PMC7582126; doi:10.1001/jamanetworkopen.2020.17109), 2020-10-22
Supplement: jamanetwopen-e2017109-s001.pdf [file jamanetwopen-e2017109-s001.pdf]

## Supplemental Online Content

Schuler A, O'Súilleabháin L, Rinetti-Vargas G, et al. Assessment of value of neighborhood socioeconomic status in models that use electronic health record data to predict health care use rates and mortality. *JAMA Netw Open*. 2020;3(10):e2017109. doi:10.1001/jamanetworkopen.2020.17109

- eTable 1.** Predictors Obtained From KPNC Databases
- eTable 2.** Distribution of RCCs in Validation Cohort
- eTable 3.** Neighborhood-Level Predictors and Distribution in Validation Cohort
- eTable 4.** URLs of Data Sources
- eFigure 1.** Model Calibration Plots
- eTable 5.** Model Outcomes
- eTable 6.** Performance Metrics for All Models
- eAppendix.** Models

This supplemental material has been provided by the authors to give readers additional information about their work.

| <b>eTABLE 1. PREDICTORS OBTAINED FROM KPNC DATABASES</b> |                                                                                                                                                                                                                                                                                                                                                                                                               |
|----------------------------------------------------------|---------------------------------------------------------------------------------------------------------------------------------------------------------------------------------------------------------------------------------------------------------------------------------------------------------------------------------------------------------------------------------------------------------------|
| <b>VARIABLE</b>                                          | <b>DESCRIPTION</b>                                                                                                                                                                                                                                                                                                                                                                                            |
| Age                                                      | Age, ≥18 years, in pre-period.                                                                                                                                                                                                                                                                                                                                                                                |
| Membership                                               | Membership is based on Membership status - a binary response for KP membership or utilization during a given month. Positive membership status in two months separated by 2 months or less with negative membership status is defined as contiguous membership. Membership is contiguous at the extremes if membership status was positive within 3 months of the beginning or end of the period.             |
| Sex                                                      | Gender, in pre-period.                                                                                                                                                                                                                                                                                                                                                                                        |
| Related Clinical Categories (RCCs)                       | RCC1 – RCC117 (see Table 2A-3 for a description of each RCC).                                                                                                                                                                                                                                                                                                                                                 |
| DxCG                                                     | Commercially available index used to predict cost. Assigned monthly to all patients with a KPNC medical record number.                                                                                                                                                                                                                                                                                        |
| COPS2                                                    | COMorbidity Point Score, version 2. Assigned monthly to all patients with a KPNC medical record number based on all accrued diagnoses within the preceding 12 months. In KPNC, this score is also assigned to all patients, in real time. Diagnoses are grouped into Hierarchical Condition Categories (HCCs) and then selected HCCs are incorporated into a regression model, as described in Escobar et al. |
| abLAPS                                                   | Abbreviated Laboratory-based Acute Physiology score. This is a simplified version of the original LAPS score. Assigned monthly to all patients with a KPNC medical record number based on 14 laboratory tests (see Table 1A-3). For each test, points are assigned based on the worst, or most deranged, laboratory test result during the preceding month.                                                   |
| Body Mass Index (BMI) <sup>a</sup>                       | A person's weight in kilograms divided by the square of height in meters. Values captured include overall mean, last observed, maximum observed, trend over the 12-month pre-period, and the difference between maximum and the mean.                                                                                                                                                                         |
| Hemoglobin A1c <sup>b</sup>                              | Mean, last observed, maximum observed, and trend over the 12-month pre-period.                                                                                                                                                                                                                                                                                                                                |
| KP.org registration status                               | Active registration in Kaiser Permanente's online patient portal (Yes/No), in pre-period.                                                                                                                                                                                                                                                                                                                     |

**Footnotes**

- a Missing values imputed to 20 kg/m<sup>2</sup>
- b Missing values are imputed to 5 mmol/L

| <b>eTABLE 2. DISTRIBUTION OF RCCS IN VALIDATION COHORT</b> |                                                 |                                             |
|------------------------------------------------------------|-------------------------------------------------|---------------------------------------------|
| <b>RCC</b>                                                 | <b>DESCRIPTION</b>                              | <b>% IN VALIDATION COHORT WITH THIS RCC</b> |
| RCC1                                                       | Infections                                      | 8.25%                                       |
| RCC2                                                       | Solid Tumors                                    | 1.40%                                       |
| RCC3                                                       | Blood and Lymph Neoplasm                        | 0.24%                                       |
| RCC4                                                       | Carcinoma In Situ                               | 0.11%                                       |
| RCC5                                                       | Benign/Uncertain Neoplasm                       | 4.66%                                       |
| RCC6                                                       | Other Neoplasms                                 | 3.03%                                       |
| RCC7                                                       | Diabetes Co-Morbidity Level                     | 7.51%                                       |
| RCC8                                                       | Type I Diabetes                                 | 1.12%                                       |
| RCC9                                                       | Malnutrition                                    | 0.50%                                       |
| RCC10                                                      | Hyperlipidemia and Lipidoses                    | 20.14%                                      |
| RCC11                                                      | Endocrine Conditions                            | 7.80%                                       |
| RCC12                                                      | Excess Weight                                   | 9.50%                                       |
| RCC13                                                      | Other Nutritional and Metabolic Conditions      | 2.70%                                       |
| RCC14                                                      | Liver Intervention and Complications            | 0.02%                                       |
| RCC15                                                      | Liver Failure                                   | 0.10%                                       |
| RCC16                                                      | Biliary and Gallbladder Conditions              | 0.43%                                       |
| RCC17                                                      | Hepatitis                                       | 1.55%                                       |
| RCC18                                                      | Alcoholic Liver, Cirrhosis, and Infarct         | 0.12%                                       |
| RCC19                                                      | Gastrointestinal Intervention and Complications | 4.47E-05                                    |
| RCC20                                                      | Peptic Ulcer and Related Conditions             | 0.39%                                       |
| RCC21                                                      | Other Gastrointestinal Conditions               | 18.18%                                      |
| RCC22                                                      | Pancreatic Disorders                            | 0.43%                                       |
| RCC23                                                      | Inflammatory Bowel Disease                      | 0.42%                                       |
| RCC24                                                      | Knee Disorders and Injuries                     | 5.24%                                       |
| RCC25                                                      | Hip Disorders and Injuries                      | 2.62%                                       |
| RCC26                                                      | Back Disorders and Injuries                     | 14.15%                                      |
| RCC27                                                      | Other Musculoskeletal Conditions                | 10.92%                                      |
| RCC28                                                      | Musculoskeletal Infection                       | 0.17%                                       |
| RCC29                                                      | Inflammatory Musculoskeletal Conditions         | 1.27%                                       |
| RCC30                                                      | Lower Leg & Foot Disorders and Injuries         | 7.81%                                       |
| RCC31                                                      | Shoulder & Upper Arm Disorders and Injuries     | 4.87%                                       |
| RCC32                                                      | Forearm & Hand Disorders and Injuries           | 5.24%                                       |
| RCC33                                                      | Hemorrhagic Conditions                          | 0.12%                                       |
| RCC34                                                      | Anemia                                          | 4.29%                                       |
| RCC35                                                      | Disorders of Immunity                           | 0.21%                                       |
| RCC36                                                      | Cognitive Disorders                             | 1.45%                                       |
| RCC37                                                      | Drug Abuse                                      | 0.99%                                       |
| RCC38                                                      | Alcohol Abuse                                   | 1.12%                                       |
| RCC39                                                      | Tobacco Use                                     | 3.61%                                       |
| RCC40                                                      | Personality Disorders                           | 0.20%                                       |
| RCC41                                                      | Other Mental Conditions                         | 4.63%                                       |
| RCC42                                                      | Psychoses                                       | 0.40%                                       |
| RCC43                                                      | Eating Disorders                                | 0.12%                                       |
| RCC44                                                      | Mood and Anxiety Disorders                      | 8.15%                                       |
| RCC45                                                      | Suicide Attempts                                | 0.05%                                       |
| RCC46                                                      | Chromosomal and Developmental Disorders         | 0.95%                                       |
| RCC47                                                      | Severe Developmental Disability                 | 2.17E-05                                    |
| RCC48                                                      | Neurological Trauma                             | 0.75%                                       |
| RCC49                                                      | Paralysis and Coma                              | 0.12%                                       |
| RCC50                                                      | Seizure Disorders                               | 0.68%                                       |

| <b>eTABLE 2. DISTRIBUTION OF RCCS IN VALIDATION COHORT</b> |                                               |                                             |
|------------------------------------------------------------|-----------------------------------------------|---------------------------------------------|
| <b>RCC</b>                                                 | <b>DESCRIPTION</b>                            | <b>% IN VALIDATION COHORT WITH THIS RCC</b> |
| RCC51                                                      | Degenerative Neurological Conditions          | 0.42%                                       |
| RCC52                                                      | Myoneural Conditions                          | 0.01%                                       |
| RCC53                                                      | Other Neurological Conditions                 | 4.94%                                       |
| RCC54                                                      | Headache                                      | 5.69%                                       |
| RCC55                                                      | Respiratory Arrest                            | 0.65%                                       |
| RCC56                                                      | Cardiac Arrest                                | 0.03%                                       |
| RCC57                                                      | Cardiovascular Intervention and Complications | 0.22%                                       |
| RCC58                                                      | Coronary Artery Disease                       | 3.01%                                       |
| RCC59                                                      | Congestive Heart Failure                      | 1.55%                                       |
| RCC60                                                      | Heart Valve and Pericardial Conditions        | 0.82%                                       |
| RCC61                                                      | Congenital Heart Conditions                   | 0.09%                                       |
| RCC62                                                      | Cardiac Arrhythmias                           | 3.16%                                       |
| RCC63                                                      | Other Heart Conditions                        | 0.17%                                       |
| RCC64                                                      | Hypertension                                  | 12.04%                                      |
| RCC65                                                      | Stroke                                        | 0.75%                                       |
| RCC66                                                      | Post-Stroke Paralysis                         | 0.47%                                       |
| RCC67                                                      | Sequelae of Cerebrovascular Events            | 0.26%                                       |
| RCC68                                                      | Cerebro-Vascular Impairment                   | 0.19%                                       |
| RCC69                                                      | Peripheral Atherosclerosis                    | 0.36%                                       |
| RCC70                                                      | Other Peripheral-Vascular Conditions          | 5.55%                                       |
| RCC71                                                      | Thrombosis/Phlebitis                          | 1.29%                                       |
| RCC72                                                      | Lung Intervention and Complications           | 2.78E-05                                    |
| RCC73                                                      | Lung Infection                                | 1.04%                                       |
| RCC74                                                      | Lung Congestion and Effusion                  | 0.26%                                       |
| RCC75                                                      | Lung Fibrosis                                 | 0.39%                                       |
| RCC76                                                      | Other Lung Conditions                         | 1.87%                                       |
| RCC77                                                      | COPD and Asthma                               | 7.86%                                       |
| RCC78                                                      | Diabetic/Other Retinopathy                    | 1.60%                                       |
| RCC79                                                      | Blindness                                     | 0.05%                                       |
| RCC80                                                      | Eye Infection and Inflammation                | 0.09%                                       |
| RCC81                                                      | Eye Intervention and Complications            | 2.75%                                       |
| RCC82                                                      | Other Eye Conditions                          | 17.74%                                      |
| RCC83                                                      | Significant ENT Disorders                     | 0.26%                                       |
| RCC84                                                      | Hearing Impairment                            | 2.99%                                       |
| RCC85                                                      | Other ENT Disorders                           | 18.83%                                      |
| RCC86                                                      | Urinary System Intervention and Complications | 0.24%                                       |
| RCC87                                                      | Chronic Kidney Disease and Failure            | 4.51%                                       |
| RCC88                                                      | Bladder and Other Urinary Conditions          | 3.78%                                       |
| RCC89                                                      | Nephritis                                     | 0.25%                                       |
| RCC90                                                      | Urinary System Infection                      | 2.80%                                       |
| RCC91                                                      | Female Genital Conditions                     | 10.15%                                      |
| RCC92                                                      | Male Genital Conditions                       | 4.39%                                       |
| RCC93                                                      | Completed/Terminated Pregnancy                | 1.91%                                       |
| RCC94                                                      | Other Pregnancy                               | 0.03%                                       |
| RCC95                                                      | Uncompleted Pregnancy                         | 1.00%                                       |
| RCC96                                                      | Severe Burns                                  | 6.30E-05                                    |
| RCC97                                                      | Skin Ulcers                                   | 0.48%                                       |
| RCC98                                                      | Other Skin Conditions                         | 21.23%                                      |
| RCC99                                                      | Head Injury                                   | 0.69%                                       |
| RCC100                                                     | Traumatic Amputation                          | 5.83E-05                                    |

| <b>eTABLE 2. DISTRIBUTION OF RCCS IN VALIDATION COHORT</b> |                                           |                                             |
|------------------------------------------------------------|-------------------------------------------|---------------------------------------------|
| <b>RCC</b>                                                 | <b>DESCRIPTION</b>                        | <b>% IN VALIDATION COHORT WITH THIS RCC</b> |
| RCC101                                                     | Other Injuries                            | 5.06%                                       |
| RCC102                                                     | Poisoning                                 | 1.33%                                       |
| RCC103                                                     | Symptoms                                  | 37.59%                                      |
| RCC104                                                     | Short Gestation and Low Birthweight       | 0.00%                                       |
| RCC105                                                     | Serious Perinatal Conditions              | 0.00%                                       |
| RCC106                                                     | Single/Multiple Birth                     | 0.00%                                       |
| RCC107                                                     | Other Perinatal Conditions                | 0.00%                                       |
| RCC108                                                     | Bone Marrow Transplant and Complications  | 0.02%                                       |
| RCC109                                                     | Artificial Openings                       | 0.18%                                       |
| RCC110                                                     | Amputation Status                         | 0.16%                                       |
| RCC111                                                     | Other V-Codes                             | 0.13%                                       |
| RCC112                                                     | Other Transplant Status and Complications | 0.15%                                       |
| RCC113                                                     | Chemical and Radiation Oncology           | 0.13%                                       |
| RCC114                                                     | Other Screening and History               | 58.71%                                      |
| RCC115                                                     | Post-Procedural Conditions                | 12.43%                                      |
| RCC116                                                     | Implant and Device Complications          | 0.34%                                       |
| RCC117                                                     | Other Complications                       | 1.48%                                       |

| <b>eTABLE 3. NEIGHBORHOOD-LEVEL PREDICTORS AND DISTRIBUTION IN VALIDATION COHORT</b> |                                                                                                                                                                                                                                                                                                                                                                                                                                                                    |                                                                                                             |                                                                |
|--------------------------------------------------------------------------------------|--------------------------------------------------------------------------------------------------------------------------------------------------------------------------------------------------------------------------------------------------------------------------------------------------------------------------------------------------------------------------------------------------------------------------------------------------------------------|-------------------------------------------------------------------------------------------------------------|----------------------------------------------------------------|
| <b>VARIABLE</b>                                                                      | <b>DESCRIPTION</b>                                                                                                                                                                                                                                                                                                                                                                                                                                                 | <b>PROVENANCE</b>                                                                                           | <b>DISTRIBUTION IN VALIDATION COHORT (MEDIAN, MEAN +/- SD)</b> |
| NDI                                                                                  | Neighborhood Deprivation Index; First component of Principal Component Analysis of 8 variables: % adult population with less than a high school diploma, % of households earning less than \$30,000/annum, % households with below poverty level income, Proportion of civilian non-institutionalized population between 18 and 64 who are unemployed, Proportion of household on public assistance % crowded housing, Proportion of households headed by females. | A standardized measure calculated internally at KPNC that capitalizes on readily available U.S. Census Data | -0.32, -0.16 ± 0.84                                            |
| D4a                                                                                  | Distance to public transit (meters) - measures the minimum walk distance between the population weighted CBG centroid and the nearest transit stop (meters). A distance greater than 3/4 of a mile was assigned a value of -9999.                                                                                                                                                                                                                                  | EPA Smart Location Database                                                                                 | -99999.00, -50163.98 ± 50223.54                                |
| publictransit_ind                                                                    | We created this variable as an interaction term with D4a - to separate people with 0 access to public transit (ie D4a<0). In the Random Forest and LASSO models it was used as an independent variable.                                                                                                                                                                                                                                                            | EPA Smart Location Database                                                                                 | 0.00, 0.50 ± 0.50                                              |
| D4c                                                                                  | Aggregate frequency of transit service within 0.25 miles of block group boundary per hour during evening peak period.                                                                                                                                                                                                                                                                                                                                              | EPA Smart Location Database                                                                                 | 1.00, 36.92 ± 94.81                                            |
| D5dri                                                                                | Regional Centrality Index for Public Transit: CBG D5dr score relative to max CBSA D5dr score. (D5dr score is Employment accessibility by public transit expressed as a ratio of total MSA accessibility)                                                                                                                                                                                                                                                           | EPA Smart Location Database                                                                                 | 0.00, 0.07 ± 0.14                                              |
| D5cri                                                                                | Regional Centrality Index for Automobiles: CBG D5cr score relative to max CBSA D5cr score. (D5cr score is Employment accessibility by automobile expressed as a ratio of total MSA accessibility)                                                                                                                                                                                                                                                                  | EPA Smart Location Database                                                                                 | 0.50, 0.51 ± 0.21                                              |
| AutoOwn0                                                                             | Number of households in CBG that own zero automobiles, 2010 decennial Census                                                                                                                                                                                                                                                                                                                                                                                       | EPA Smart Location Database                                                                                 | 22.00, 49.51 ± 98.57                                           |
| LA1and20                                                                             | A low-income tract with at least 500 people, or 33 percent of the population, living more than 1 mile (urban areas) or more than 20 miles (rural areas) from the nearest supermarket, supercenter, or large grocery store.                                                                                                                                                                                                                                         | United States Department of Agriculture (USDA) Food                                                         | 0.00, 0.29 ± 0.45                                              |

|                   |                                                                                                                                                                                                                                                                     |                                                                           |                          |
|-------------------|---------------------------------------------------------------------------------------------------------------------------------------------------------------------------------------------------------------------------------------------------------------------|---------------------------------------------------------------------------|--------------------------|
|                   |                                                                                                                                                                                                                                                                     | Access Research Atlas                                                     |                          |
| LILAtracts_1And10 | A low-income tract with at least 500 people, or 33 percent of the population, living more than 1 mile (urban areas) or more than 10 miles (rural areas) from the nearest supermarket, supercenter, or large grocery store.                                          | United States Department of Agriculture (USDA) Food Access Research Atlas | 0.00, 0.04 ± 0.21        |
| NatWalkInd        | The Walkability Index dataset characterizes every Census 2010 block group in the U.S. based on its relative walkability. Walkability depends upon characteristics of the built environment that influence the likelihood of walking being used as a mode of travel. | EPA Smart Location Mapping                                                | 11.17, 11.21 ± 3.93      |
| D1A               | Gross residential density (HU/acre) on unprotected land                                                                                                                                                                                                             | EPA Smart Location Database                                               | 3.96, 5.59 ± 8.50        |
| D1B               | Gross population density (people/acre) on unprotected land                                                                                                                                                                                                          | EPA Smart Location Database                                               | 10.78, 13.80 ± 15.54     |
| D1C               | Gross employment density (jobs/acre) on unprotected land                                                                                                                                                                                                            | EPA Smart Location Database                                               | 1.06, 4.12 ± 20.04       |
| EMPTOT            | Total employment in CBSA (CBSA_Emp)                                                                                                                                                                                                                                 | EPA Smart Location Database                                               | 194.00, 724.95 ± 2516.62 |
| Ozone             | Mean of summer months (May-October) of the daily maximum 8-hour ozone concentration (ppm), averaged over three years (2012 to 2014)                                                                                                                                 | California Communities Environmental Health Screening Tool                | 0.04, 0.04 ± 0.01        |
| Diesel_PM         | Spatial distribution of gridded diesel PM emissions from on-road and non-road sources for a 2012 summer day in July (kg/day).                                                                                                                                       | California Communities Environmental Health Screening Tool                | 15.98, 20.22 ± 16.72     |
| PM2_5             | Annual mean concentration of PM2.5 (average of quarterly means, µg/m3), over three years (2012 to 2014).                                                                                                                                                            | California Communities Environmental Health Screening Tool                | 8.70, 9.13 ± 1.84        |

|                        |                                                                                                                                                                                                                                                                                                                                                                                                                                                                                                   |                                                            |                          |
|------------------------|---------------------------------------------------------------------------------------------------------------------------------------------------------------------------------------------------------------------------------------------------------------------------------------------------------------------------------------------------------------------------------------------------------------------------------------------------------------------------------------------------|------------------------------------------------------------|--------------------------|
| Tox_Releases (RSEIhaz) | Toxicity-weighted concentrations of modeled chemical releases to air from facility emissions and off-site incineration (averaged over 2011 to 2013)                                                                                                                                                                                                                                                                                                                                               | California Communities Environmental Health Screening Tool | 219.71, 551.55 ± 2628.18 |
| Traffic                | Traffic density – Sum of traffic volumes adjusted by road segment length (vehicle-kilometers per hour) divided by total road length (kilometers) within 150 meters of the census tract boundary (2013)                                                                                                                                                                                                                                                                                            | California Communities Environmental Health Screening Tool | 647.81, 826.07 ± 563.37  |
| Haz_Waste              | Sum of weighted permitted hazardous waste facilities and hazardous waste generators within each census tract.                                                                                                                                                                                                                                                                                                                                                                                     | California Communities Environmental Health Screening Tool | 0.05, 0.47 ± 1.55        |
| Solid_Waste            | Sum of weighted solid waste sites and facilities (as of December 2016)                                                                                                                                                                                                                                                                                                                                                                                                                            | California Communities Environmental Health Screening Tool | 0.00, 1.74 ± 4.34        |
| PollutionScore         | Pollution Burden scores for each census tract are derived from the average percentiles of the seven Exposures indicators (ozone and PM2.5 concentrations, diesel PM emissions, drinking water contaminants, pesticide use, toxic releases from facilities, and traffic density) and the five Environmental Effects indicators (cleanup sites, impaired water bodies, groundwater threats, hazardous waste facilities and generators, and solid waste sites and facilities). Ranging from 0.1 - 10 | California Communities Environmental Health Screening Tool | 4.25, 4.43 ± 1.37        |
| DrinkingWater          | Drinking water contaminant index for selected contaminants                                                                                                                                                                                                                                                                                                                                                                                                                                        | California Communities Environmental Health Screening Tool | 278.76, 347.90 ± 255.36  |
| GroundwaterThreats     | Groundwater threats                                                                                                                                                                                                                                                                                                                                                                                                                                                                               | California Communities Environmental Health Screening Tool | 10.00, 22.26 ± 48.40     |
| DM                     | General areas of drought labeled by intensity. D1 is the least intense level and D4 the most intense. Drought is defined as a moisture deficit bad enough to have social, environmental or economic effects. D0 areas are not in drought but are                                                                                                                                                                                                                                                  | California Communities Environmental                       | 4.00, 3.65 ± 0.48        |



|                           |                                                                                                                                    |                                                 |                        |
|---------------------------|------------------------------------------------------------------------------------------------------------------------------------|-------------------------------------------------|------------------------|
|                           | experiencing abnormally dry conditions that could turn into drought or are recovering from drought but are not yet back to normal. | Health Screening Tool                           |                        |
| 2017 Personal Crime Index | Personal Crime Index                                                                                                               | Environmental Systems Research Institute (Esri) | 70.00, 107.93 ± 117.88 |
| 2017 Property Crime Index | Property Crime Index                                                                                                               | Environmental Systems Research Institute (Esri) | 87.00, 105.66 ± 76.43  |

**eTABLE 4. URLS OF DATA SOURCES**

|                                                 |                                                                                                                                                                                                         |
|-------------------------------------------------|---------------------------------------------------------------------------------------------------------------------------------------------------------------------------------------------------------|
| US Department of Agriculture                    | <a href="https://www.ers.usda.gov/data-products/food-access-research-atlas/documentation/#definitions">https://www.ers.usda.gov/data-products/food-access-research-atlas/documentation/#definitions</a> |
| US Environmental Protection Agency              | <a href="https://www.epa.gov/sites/production/files/2014-03/documents/sld_userguide.pdf#page=3">https://www.epa.gov/sites/production/files/2014-03/documents/sld_userguide.pdf#page=3</a>               |
| California Environmental Protection Agency      | <a href="https://oehha.ca.gov/media/downloads/calenviroscreen/report/ces3report.pdf">https://oehha.ca.gov/media/downloads/calenviroscreen/report/ces3report.pdf</a>                                     |
| National Oceanic and Atmospheric Administration | <a href="https://droughtmonitor.unl.edu/">https://droughtmonitor.unl.edu/</a>                                                                                                                           |

eFIGURE. CALIBRATION PLOTS

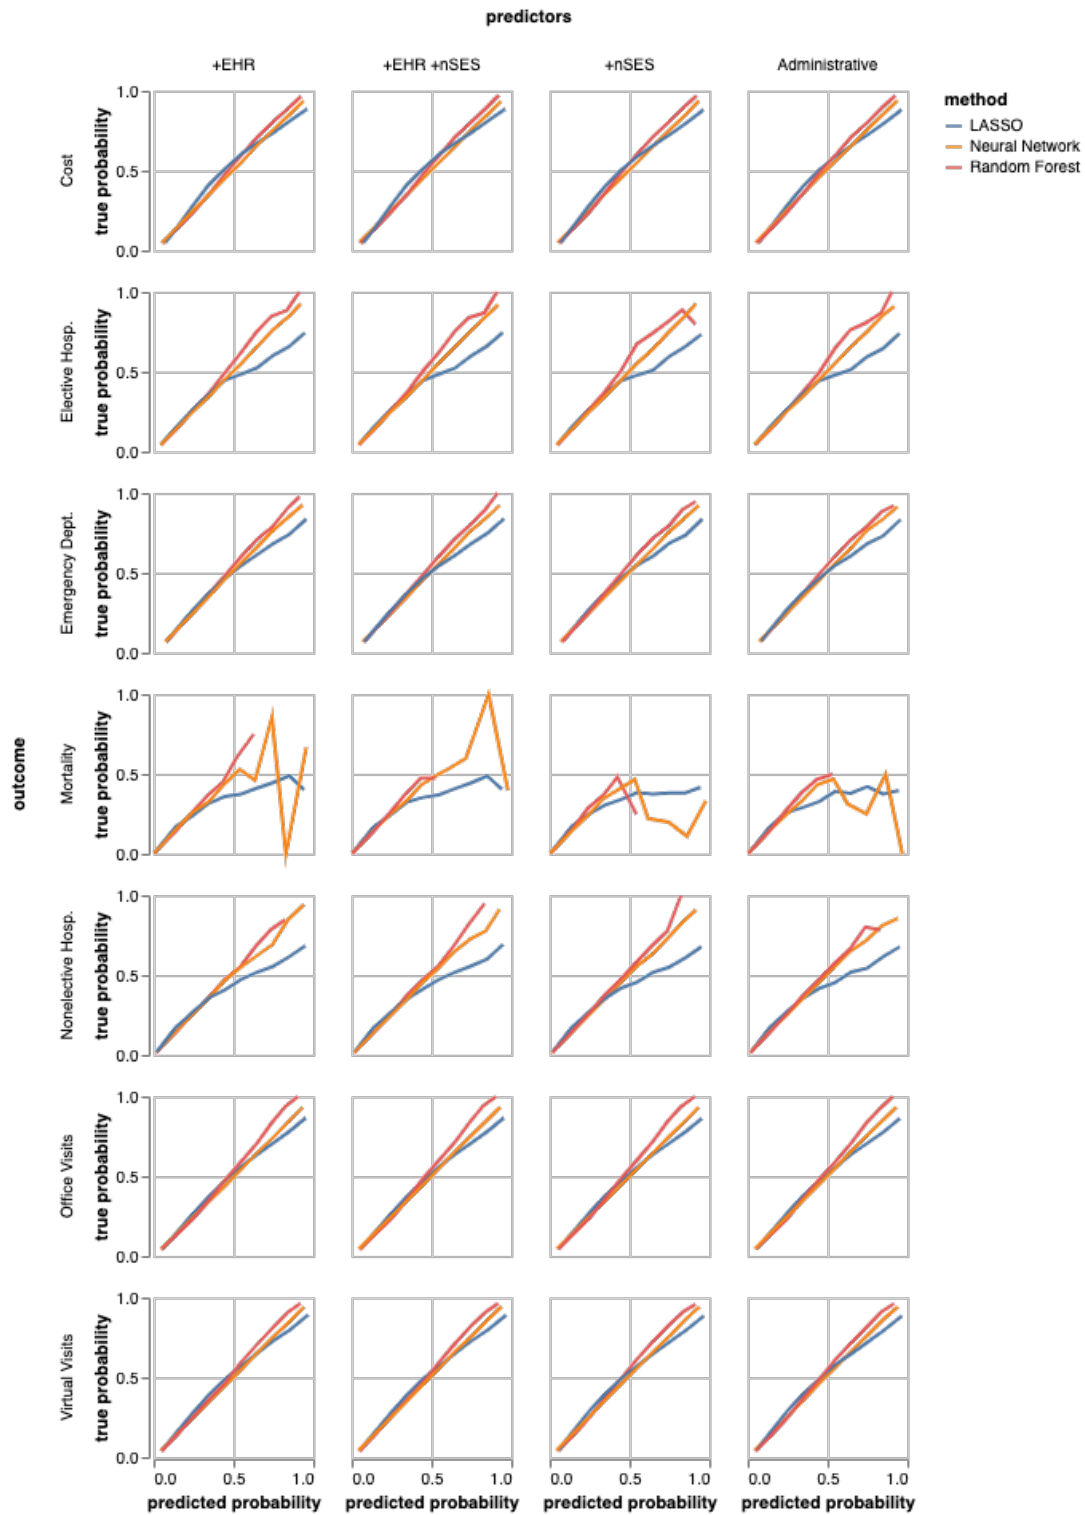

\* Calibration in the mortality model deteriorates when the probability > 0.5 because the outcome is quite rare. This is also why the AUPRC statistics for the mortality model are relatively poor.

| <b>eTABLE 5. MODEL OUTCOMES</b> |                                                                                                                               |                                   |
|---------------------------------|-------------------------------------------------------------------------------------------------------------------------------|-----------------------------------|
| <b>OUTCOME</b>                  | <b>DESCRIPTION</b>                                                                                                            | <b>80<sup>th</sup> PERCENTILE</b> |
| In-person outpatient visits     | All office clinic visits, including addiction & mental health.                                                                | ≤5 vs ≥6                          |
| Virtual visits                  | Telephone and video visits; scheduled and unscheduled.                                                                        | ≤5 vs ≥6                          |
| Emergency department visits     | Emergency department visits that did not result in a hospitalization. Includes Emergency Department Treat and Release visits. | 0 vs ≥1                           |
| Elective hospitalization        | Planned hospitalizations (inpatient and observation) that did not begin in the Emergency Department.                          | 0 vs ≥1                           |
| Non-elective hospitalization    | Unplanned hospitalizations (inpatient and observation) that did begin in the Emergency Department.                            | 0 vs ≥1                           |
| Cost                            | Summary of Ancillary, Hospital, Scripts, Continuum, Operating Room, Emergency Room and Clinic costs.                          | <\$3,982.21 vs ≥\$3982.21         |
| Death                           | Death in the post period.                                                                                                     | -                                 |

| <b>eTABLE 6. PERFORMANCE METRICS FOR ALL MODELS</b> |                |                   |              |              |                    |                    |
|-----------------------------------------------------|----------------|-------------------|--------------|--------------|--------------------|--------------------|
| <b>OUTCOME</b>                                      | <b>METHOD</b>  | <b>PREDICTORS</b> | <b>AUROC</b> | <b>AUPRC</b> | <b>MCFADDEN R2</b> | <b>BRIER SCORE</b> |
| Cost                                                | Random Forest  | +EHR              | 0.846        | 0.649        | 0.292              | 0.108              |
| Cost                                                | LASSO          | +EHR              | 0.821        | 0.590        | 0.231              | 0.119              |
| Cost                                                | Neural Network | +EHR              | 0.847        | 0.653        | 0.295              | 0.108              |
| Cost                                                | Neural Network | +EHR +nSES        | 0.844        | 0.646        | 0.289              | 0.109              |
| Cost                                                | Random Forest  | +EHR +nSES        | 0.846        | 0.647        | 0.291              | 0.109              |
| Cost                                                | LASSO          | +EHR +nSES        | 0.821        | 0.590        | 0.231              | 0.119              |
| Cost                                                | Random Forest  | +nSES             | 0.846        | 0.645        | 0.290              | 0.109              |
| Cost                                                | Neural Network | +nSES             | 0.843        | 0.644        | 0.287              | 0.109              |
| Cost                                                | LASSO          | +nSES             | 0.823        | 0.595        | 0.235              | 0.118              |
| Cost                                                | LASSO          | Administrative    | 0.823        | 0.595        | 0.235              | 0.118              |
| Cost                                                | Random Forest  | Administrative    | 0.846        | 0.647        | 0.291              | 0.109              |
| Cost                                                | Neural Network | Administrative    | 0.847        | 0.651        | 0.294              | 0.108              |
| Mortality                                           | Random Forest  | +EHR              | 0.940        | 0.227        | 0.374              | 0.006              |
| Mortality                                           | LASSO          | +EHR              | 0.933        | 0.212        | 0.352              | 0.006              |
| Mortality                                           | Neural Network | +EHR              | 0.940        | 0.219        | 0.374              | 0.006              |
| Mortality                                           | Neural Network | +EHR +nSES        | 0.940        | 0.222        | 0.377              | 0.006              |
| Mortality                                           | Random Forest  | +EHR +nSES        | 0.940        | 0.224        | 0.373              | 0.006              |
| Mortality                                           | LASSO          | +EHR +nSES        | 0.933        | 0.213        | 0.354              | 0.006              |
| Mortality                                           | Random Forest  | +nSES             | 0.938        | 0.211        | 0.366              | 0.006              |
| Mortality                                           | Neural Network | +nSES             | 0.937        | 0.204        | 0.366              | 0.006              |
| Mortality                                           | LASSO          | +nSES             | 0.932        | 0.196        | 0.342              | 0.006              |
| Mortality                                           | LASSO          | Administrative    | 0.931        | 0.195        | 0.341              | 0.006              |
| Mortality                                           | Random Forest  | Administrative    | 0.939        | 0.215        | 0.368              | 0.006              |
| Mortality                                           | Neural Network | Administrative    | 0.938        | 0.211        | 0.370              | 0.006              |
| Office Visits                                       | Random Forest  | +EHR              | 0.833        | 0.579        | 0.256              | 0.108              |
| Office Visits                                       | LASSO          | +EHR              | 0.819        | 0.551        | 0.228              | 0.112              |
| Office Visits                                       | Neural Network | +EHR              | 0.834        | 0.583        | 0.259              | 0.108              |
| Office Visits                                       | Neural Network | +EHR +nSES        | 0.832        | 0.580        | 0.256              | 0.108              |
| Office Visits                                       | Random Forest  | +EHR +nSES        | 0.833        | 0.578        | 0.255              | 0.109              |

| <b>eTABLE 6. PERFORMANCE METRICS FOR ALL MODELS</b> |                |                   |              |              |                    |                    |
|-----------------------------------------------------|----------------|-------------------|--------------|--------------|--------------------|--------------------|
| <b>OUTCOME</b>                                      | <b>METHOD</b>  | <b>PREDICTORS</b> | <b>AUROC</b> | <b>AUPRC</b> | <b>MCFADDEN R2</b> | <b>BRIER SCORE</b> |
| Office Visits                                       | LASSO          | +EHR +nSES        | 0.819        | 0.551        | 0.228              | 0.112              |
| Office Visits                                       | Random Forest  | +nSES             | 0.833        | 0.577        | 0.255              | 0.109              |
| Office Visits                                       | Neural Network | +nSES             | 0.832        | 0.578        | 0.255              | 0.108              |
| Office Visits                                       | LASSO          | +nSES             | 0.818        | 0.550        | 0.225              | 0.113              |
| Office Visits                                       | LASSO          | Administrative    | 0.818        | 0.550        | 0.225              | 0.113              |
| Office Visits                                       | Random Forest  | Administrative    | 0.833        | 0.578        | 0.256              | 0.109              |
| Office Visits                                       | Neural Network | Administrative    | 0.834        | 0.582        | 0.259              | 0.108              |
| Emergency Dept.                                     | Random Forest  | +EHR              | 0.730        | 0.396        | 0.123              | 0.112              |
| Emergency Dept.                                     | LASSO          | +EHR              | 0.718        | 0.385        | 0.110              | 0.114              |
| Emergency Dept.                                     | Neural Network | +EHR              | 0.731        | 0.399        | 0.125              | 0.112              |
| Emergency Dept.                                     | Neural Network | +EHR +nSES        | 0.732        | 0.401        | 0.126              | 0.112              |
| Emergency Dept.                                     | Random Forest  | +EHR +nSES        | 0.731        | 0.397        | 0.124              | 0.112              |
| Emergency Dept.                                     | LASSO          | +EHR +nSES        | 0.722        | 0.387        | 0.113              | 0.114              |
| Emergency Dept.                                     | Random Forest  | +nSES             | 0.730        | 0.395        | 0.123              | 0.112              |
| Emergency Dept.                                     | Neural Network | +nSES             | 0.730        | 0.399        | 0.124              | 0.112              |
| Emergency Dept.                                     | LASSO          | +nSES             | 0.719        | 0.385        | 0.110              | 0.114              |
| Emergency Dept.                                     | LASSO          | Administrative    | 0.715        | 0.382        | 0.107              | 0.114              |
| Emergency Dept.                                     | Random Forest  | Administrative    | 0.728        | 0.394        | 0.122              | 0.112              |
| Emergency Dept.                                     | Neural Network | Administrative    | 0.729        | 0.397        | 0.124              | 0.112              |
| Nonelective Hosp.                                   | Random Forest  | +EHR              | 0.854        | 0.278        | 0.244              | 0.027              |
| Nonelective Hosp.                                   | LASSO          | +EHR              | 0.846        | 0.267        | 0.229              | 0.028              |
| Nonelective Hosp.                                   | Neural Network | +EHR              | 0.856        | 0.281        | 0.247              | 0.027              |
| Nonelective Hosp.                                   | Neural Network | +EHR +nSES        | 0.855        | 0.280        | 0.246              | 0.027              |
| Nonelective Hosp.                                   | Random Forest  | +EHR +nSES        | 0.853        | 0.277        | 0.244              | 0.027              |
| Nonelective Hosp.                                   | LASSO          | +EHR +nSES        | 0.847        | 0.267        | 0.230              | 0.028              |
| Nonelective Hosp.                                   | Random Forest  | +nSES             | 0.852        | 0.273        | 0.241              | 0.027              |
| Nonelective Hosp.                                   | Neural Network | +nSES             | 0.854        | 0.277        | 0.244              | 0.027              |

| <b>eTABLE 6. PERFORMANCE METRICS FOR ALL MODELS</b> |                |                   |              |              |                    |                    |
|-----------------------------------------------------|----------------|-------------------|--------------|--------------|--------------------|--------------------|
| <b>OUTCOME</b>                                      | <b>METHOD</b>  | <b>PREDICTORS</b> | <b>AUROC</b> | <b>AUPRC</b> | <b>MCFADDEN R2</b> | <b>BRIER SCORE</b> |
| Nonelective Hosp.                                   | LASSO          | +nSES             | 0.844        | 0.263        | 0.226              | 0.028              |
| Nonelective Hosp.                                   | LASSO          | Administrative    | 0.844        | 0.263        | 0.225              | 0.028              |
| Nonelective Hosp.                                   | Random Forest  | Administrative    | 0.853        | 0.274        | 0.242              | 0.027              |
| Nonelective Hosp.                                   | Neural Network | Administrative    | 0.854        | 0.277        | 0.245              | 0.027              |
| Elective Hosp.                                      | Random Forest  | +EHR              | 0.785        | 0.361        | 0.173              | 0.070              |
| Elective Hosp.                                      | LASSO          | +EHR              | 0.765        | 0.301        | 0.137              | 0.074              |
| Elective Hosp.                                      | Neural Network | +EHR              | 0.786        | 0.361        | 0.175              | 0.070              |
| Elective Hosp.                                      | Neural Network | +EHR +nSES        | 0.785        | 0.357        | 0.172              | 0.071              |
| Elective Hosp.                                      | Random Forest  | +EHR +nSES        | 0.785        | 0.360        | 0.173              | 0.070              |
| Elective Hosp.                                      | LASSO          | +EHR +nSES        | 0.766        | 0.301        | 0.137              | 0.074              |
| Elective Hosp.                                      | Random Forest  | +nSES             | 0.785        | 0.356        | 0.172              | 0.071              |
| Elective Hosp.                                      | Neural Network | +nSES             | 0.785        | 0.352        | 0.170              | 0.071              |
| Elective Hosp.                                      | LASSO          | +nSES             | 0.764        | 0.299        | 0.135              | 0.074              |
| Elective Hosp.                                      | LASSO          | Administrative    | 0.763        | 0.299        | 0.134              | 0.074              |
| Elective Hosp.                                      | Random Forest  | Administrative    | 0.785        | 0.357        | 0.172              | 0.071              |
| Elective Hosp.                                      | Neural Network | Administrative    | 0.786        | 0.357        | 0.173              | 0.071              |
| Virtual Visits                                      | Random Forest  | +EHR              | 0.857        | 0.630        | 0.308              | 0.095              |
| Virtual Visits                                      | LASSO          | +EHR              | 0.847        | 0.611        | 0.278              | 0.098              |
| Virtual Visits                                      | Neural Network | +EHR              | 0.859        | 0.633        | 0.311              | 0.095              |
| Virtual Visits                                      | Neural Network | +EHR +nSES        | 0.859        | 0.633        | 0.311              | 0.095              |
| Virtual Visits                                      | Random Forest  | +EHR +nSES        | 0.858        | 0.631        | 0.308              | 0.095              |
| Virtual Visits                                      | LASSO          | +EHR +nSES        | 0.848        | 0.612        | 0.280              | 0.098              |
| Virtual Visits                                      | Random Forest  | +nSES             | 0.856        | 0.626        | 0.304              | 0.096              |
| Virtual Visits                                      | Neural Network | +nSES             | 0.857        | 0.628        | 0.306              | 0.096              |
| Virtual Visits                                      | LASSO          | +nSES             | 0.846        | 0.607        | 0.273              | 0.099              |
| Virtual Visits                                      | LASSO          | Administrative    | 0.845        | 0.606        | 0.271              | 0.099              |
| Virtual Visits                                      | Random Forest  | Administrative    | 0.856        | 0.626        | 0.304              | 0.096              |
| Virtual Visits                                      | Neural Network | Administrative    | 0.857        | 0.628        | 0.306              | 0.096              |

## **eAPPENDIX. MODELS**

Our neural network is a multi-task feedforward network that simultaneously predicts all outcomes. It was built in the python pytorch framework and trained with the fastai python package. The model was defined by a 9-layer feedforward network with maximum hidden layer of size 1000 and a bottleneck hidden layer of size 10. The training loss across all 7 outcomes was defined as the sum of the outcome-specific cross-entropy losses. The neural net was trained using a batch size of 1000, using the AdamW optimizer with cyclical learning rate and momentum policy and all other hyperparameters left at their defaults. The first layer included a dropout layer at 20%. All layers used BatchNorm and LeakyRelu activation functions, except for the last layer, which used the sigmoid activation function. Our random forest and LASSO models were fit using the h2o python package. Each random forest model used 200 trees and all other parameters were left at their default values. The regularization parameter for the LASSO model was chosen by maximizing AUC in 5-fold cross-validation on the training dataset.
